# Supplementary material for: Assessment of the Effectiveness of Zone 1-Landing Hybrid TEVAR by Comparing Its Outcomes with Those of Zone 2-Landing Hybrid TEVAR
Source: MDPI journal article supplement (doi:10.3390/jcm12165326), 2023-08-16
Supplement: s1 [file s1]

Supplementary Figure S1A

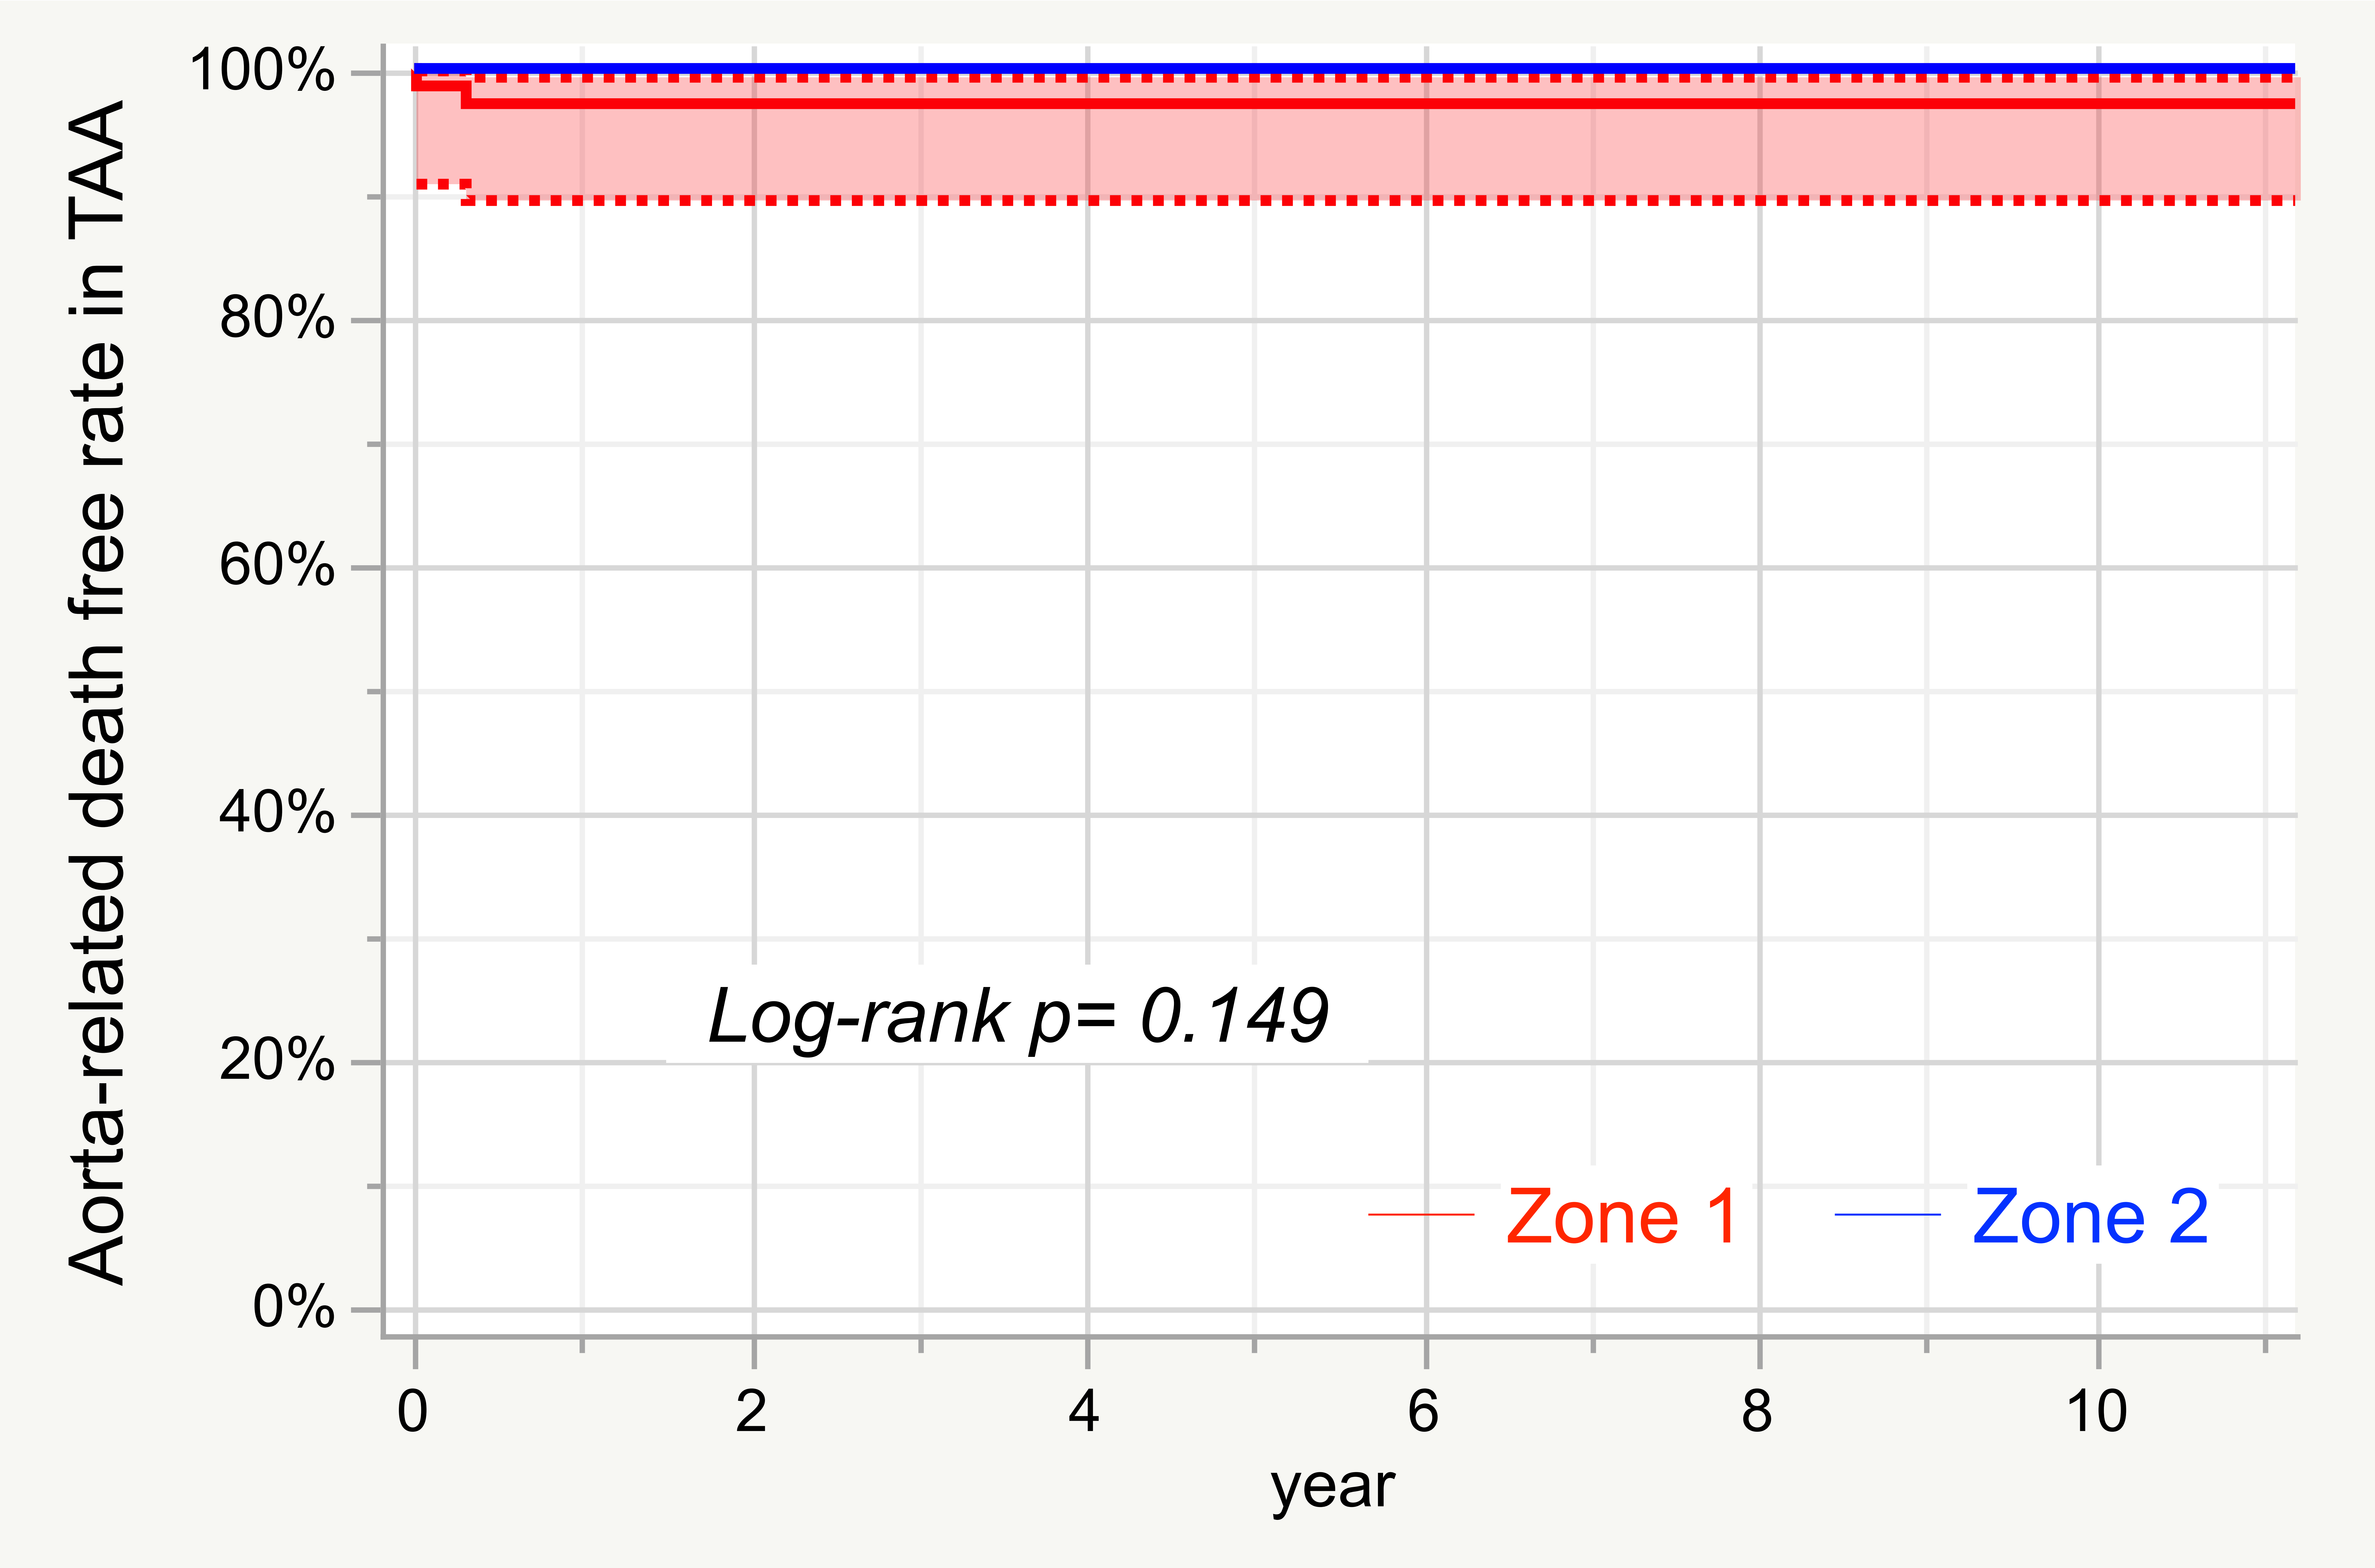

| Patient at risk (n) | 0  | 1  | 3  | 5  | 10 |
|---------------------|----|----|----|----|----|
| Zone 1              | 71 | 66 | 50 | 43 | 10 |
| Zone 2              | 73 | 73 | 55 | 46 | 18 |

Supplementary Figure S1B

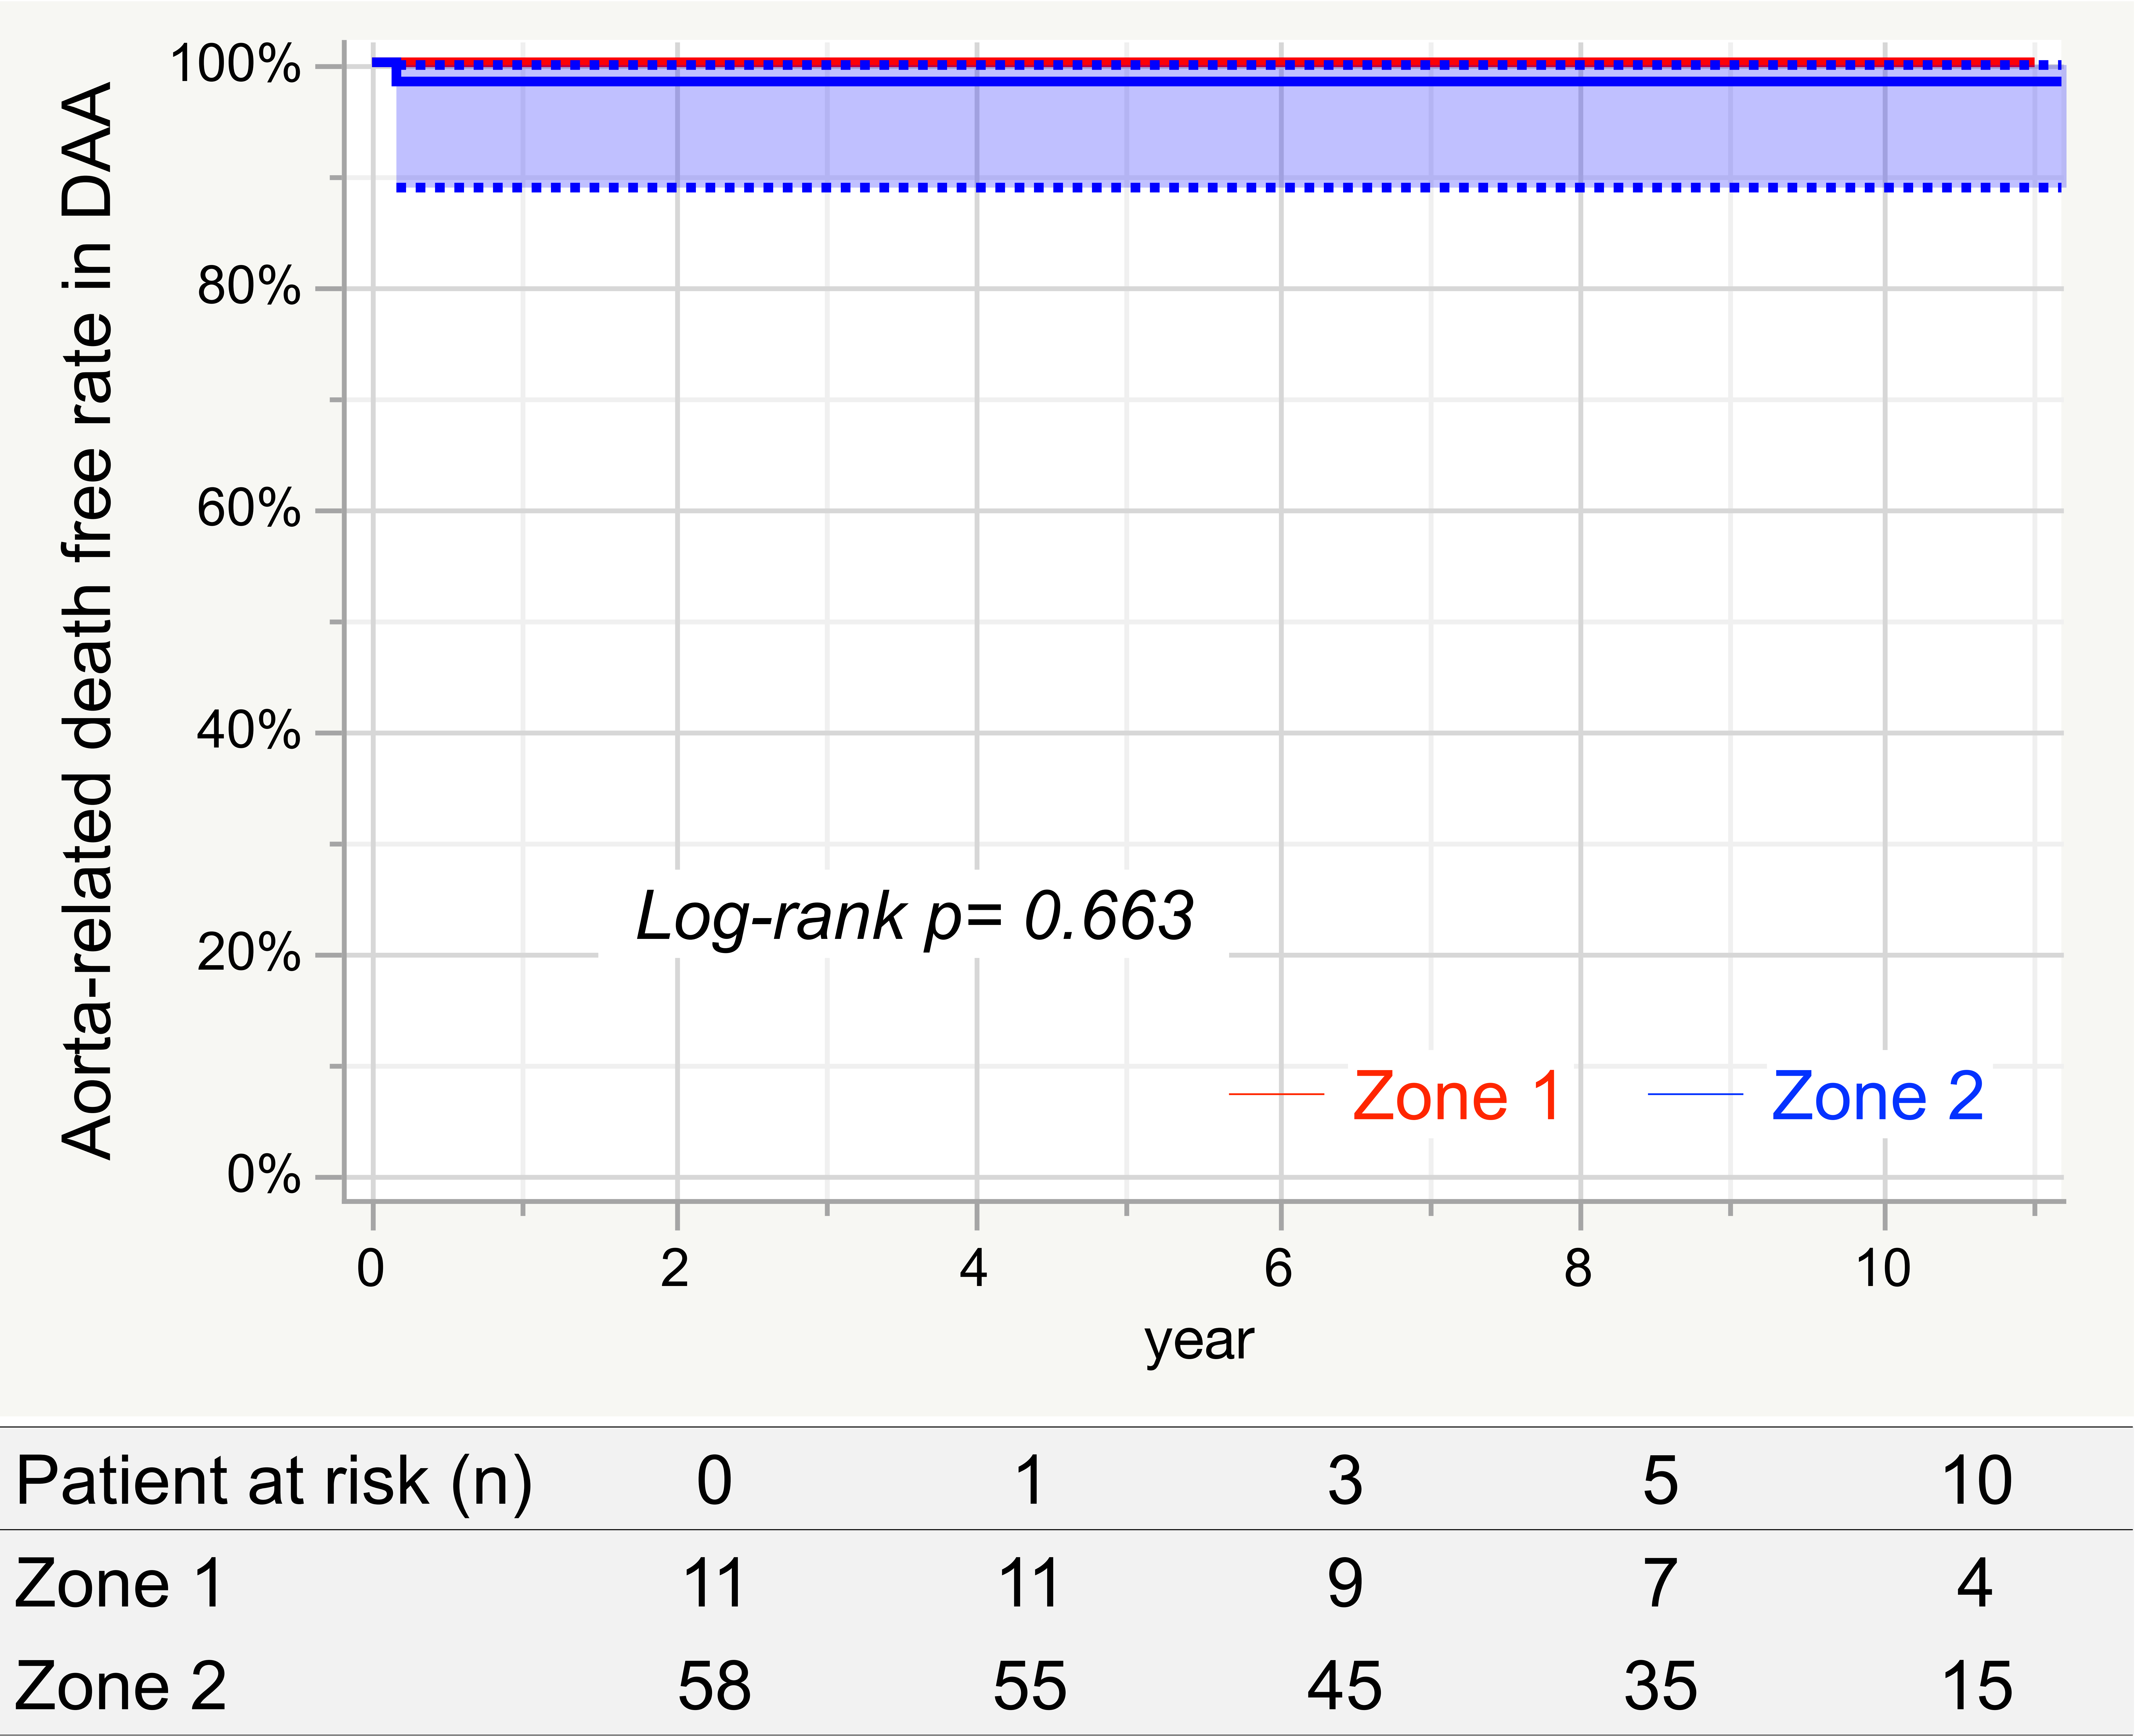

Supplementary Figure S1C

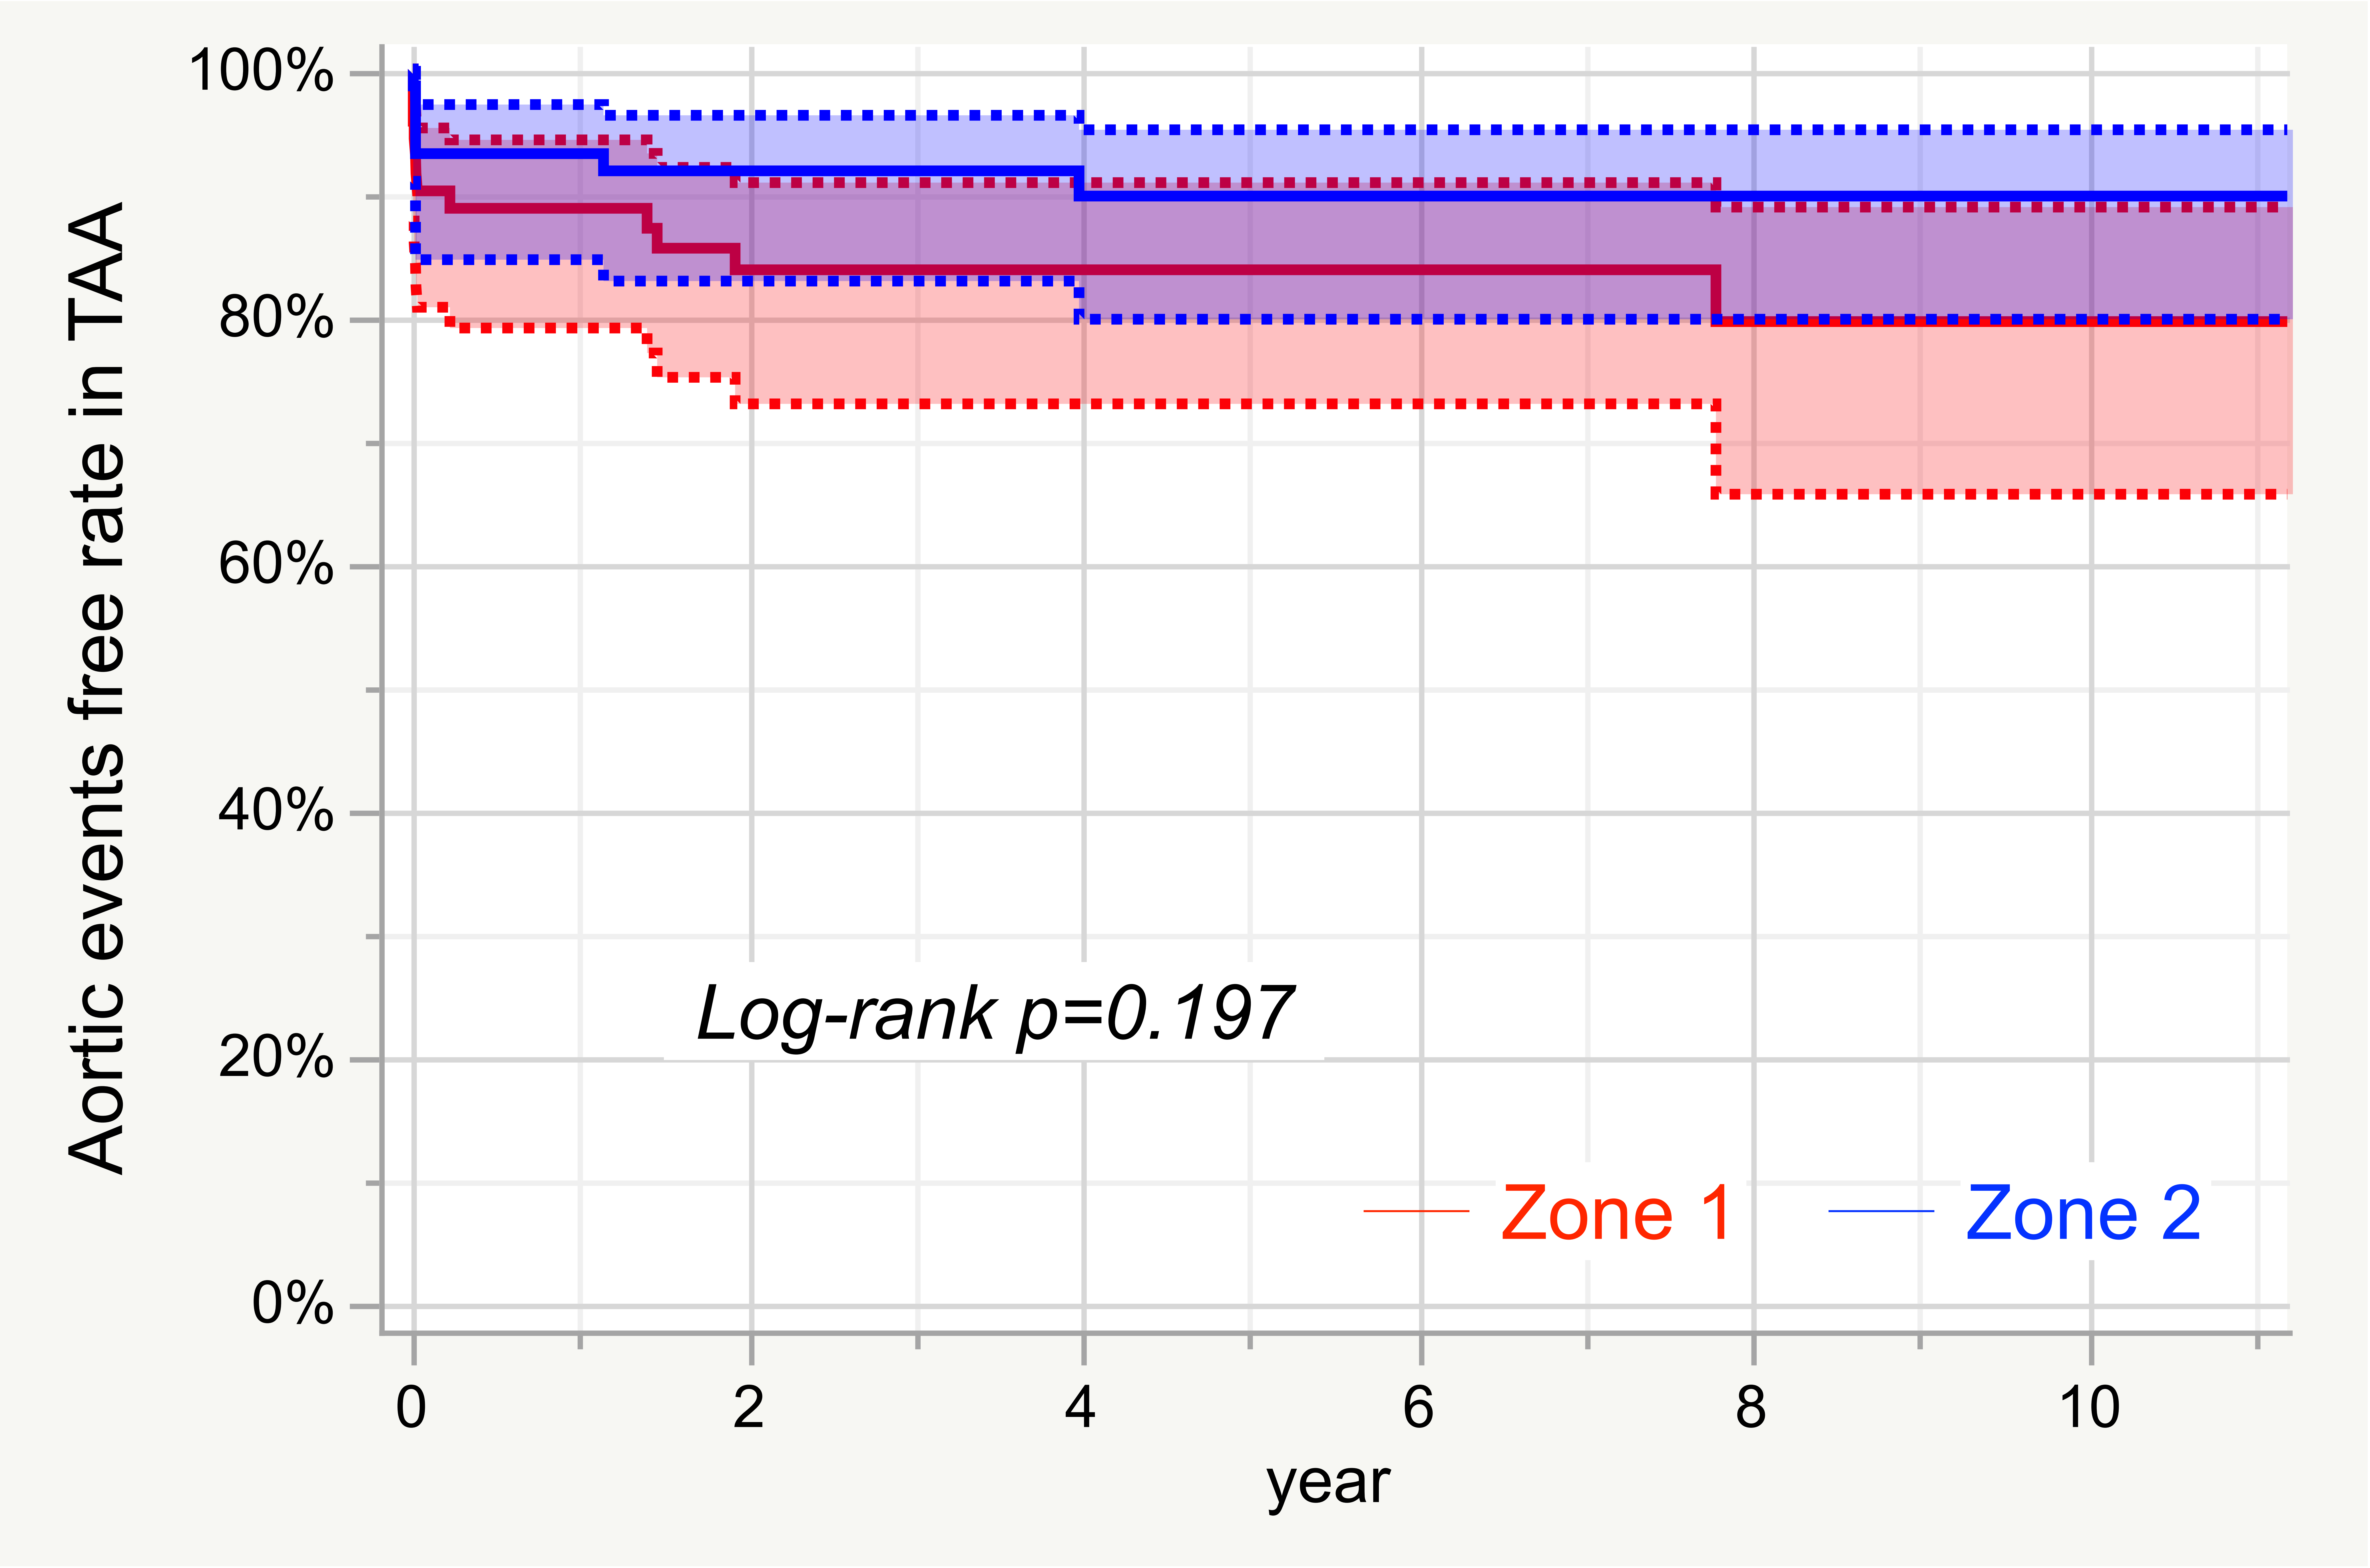

| Patient at risk (n) | 0  | 1  | 3  | 5  | 10 |
|---------------------|----|----|----|----|----|
| Zone 1              | 71 | 59 | 41 | 33 | 8  |
| Zone 2              | 73 | 68 | 49 | 40 | 16 |

Supplementary Figure S1D

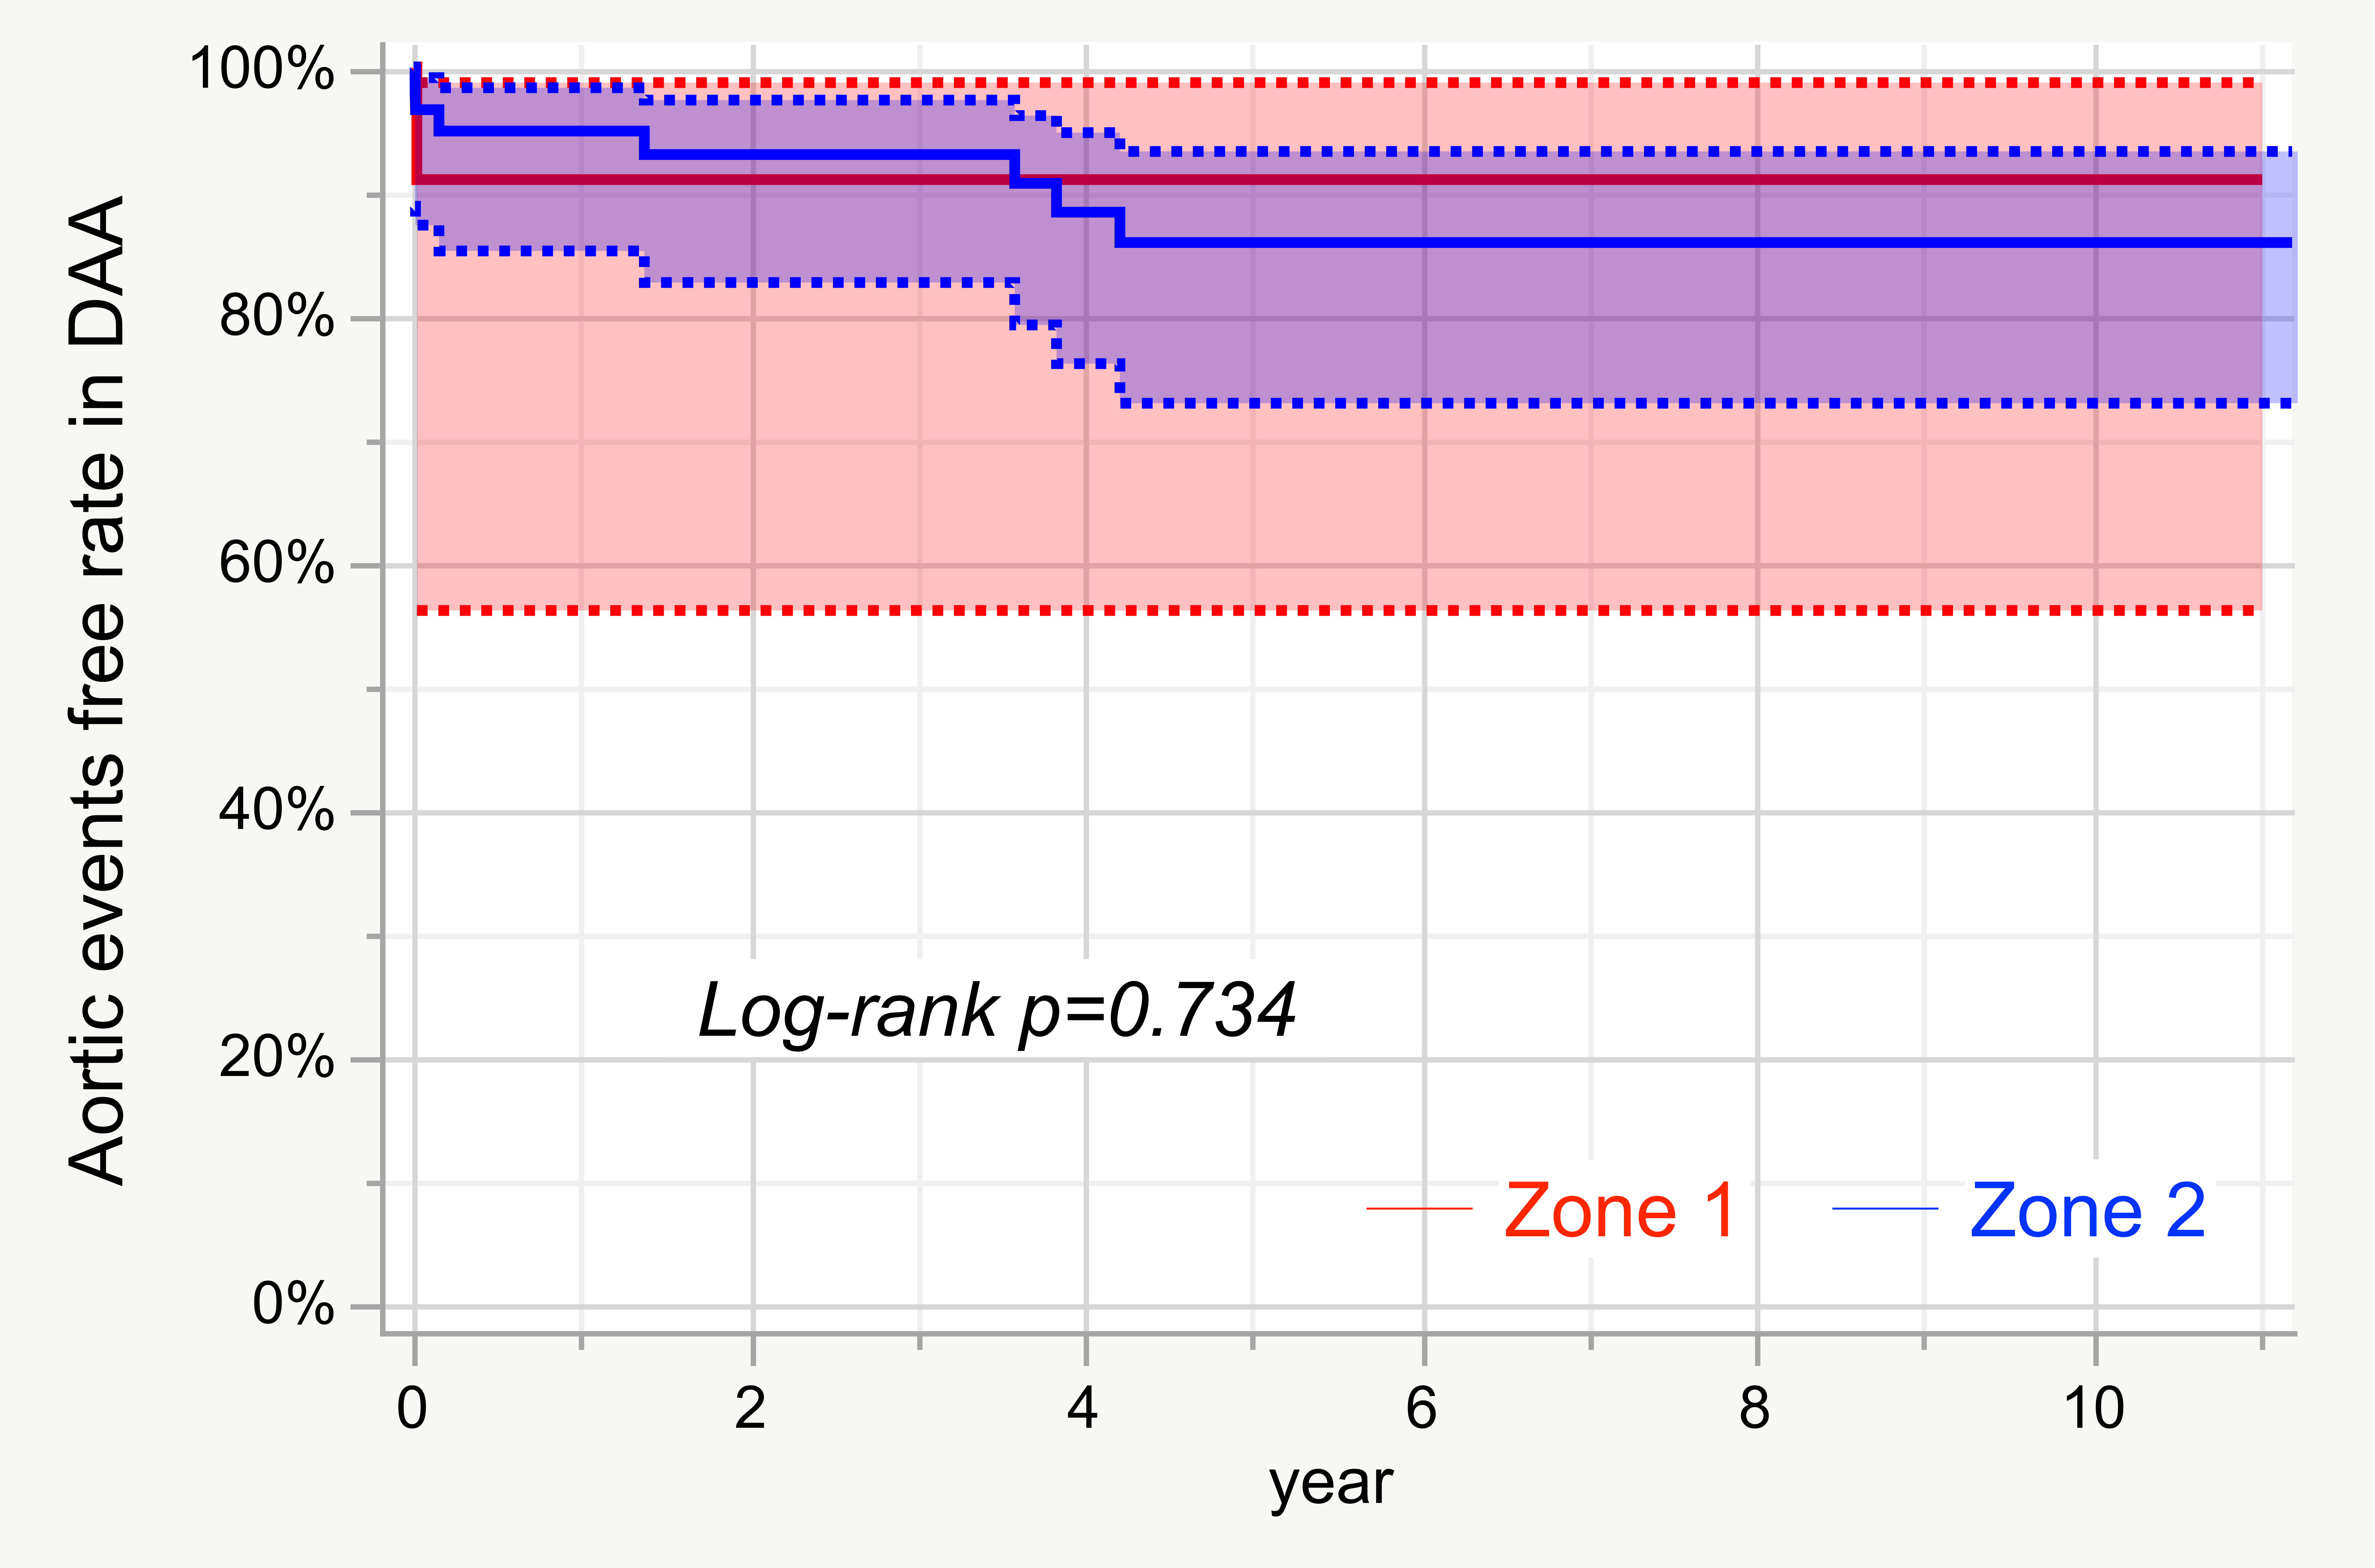

| Patient at risk (n) | 0  | 1  | 3  | 5  | 10 |
|---------------------|----|----|----|----|----|
| Zone 1              | 11 | 11 | 10 | 9  | 4  |
| Zone 2              | 58 | 53 | 42 | 30 | 12 |

**Table S1: Comparison of the outcomes in aortic pathologies**

|                                | TAA (n=144)            |                        |         |  | DAA (n=69)             |                        |         |
|--------------------------------|------------------------|------------------------|---------|--|------------------------|------------------------|---------|
|                                | Zone 1<br>n=71 (86.6%) | Zone 2<br>n=73 (55.7%) | P value |  | Zone 1<br>n=11 (13.4%) | Zone 2<br>n=58 (44.3%) | P value |
| <b>Patient characteristics</b> |                        |                        |         |  |                        |                        |         |
| Age (years)                    | 76 (69-80)             | 74 (67-80)             | 0.2518  |  | 61 (59-68)             | 68 (56-73)             | 0.1785  |
| Age ≥80 years, n (%)           | 19 (26.8)              | 19 (26.0)              | 0.9205  |  | 0                      | 5 (8.6)                | 0.5847  |
| Female, n (%)                  | 11 (15.5)              | 16 (21.9)              | 0.3234  |  | 2 (18.2)               | 13 (22.4)              | 1.00    |
| Emergency, n (%)               | 7 (9.9)                | 5 (6.9)                | 0.5135  |  | 4 (36.4)               | 17 (29.3)              | 0.7248  |
| Logistic EuroSCORE (%)         | 24.7±16.8              | 19.8±13.8              | 0.0596  |  | 14.4±6.0               | 18.7±10.5              | 0.1934  |
|                                |                        |                        |         |  |                        |                        |         |
| <b>Operative outcomes</b>      |                        |                        |         |  |                        |                        |         |
| Operative time (minutes)       | 191 (164-218)          | 139 (108-174)          | <0.0001 |  | 202 (148-225)          | 144 (117-170)          | 0.0256  |
|                                |                        |                        |         |  |                        |                        |         |
| <b>In-hospital outcomes</b>    |                        |                        |         |  |                        |                        |         |
| 30-day mortality, n (%)        | 1 (1.4)*               | 0                      | 0.4931  |  | 0                      | 0                      | 1.00    |
| Hospital mortality, n (%)      | 1 (1.4)*               | 0                      | 0.4931  |  | 0                      | 1 (1.7) <sup>+</sup>   | 1.00    |
| Hospital stay (days)           | 11 (9-19)              | 9 (8-13)               | 0.0039  |  | 16 (10-22)             | 10 (8-16)              | 0.0889  |
| Discharge at home, n (%)       | 67 (94.4)              | 71 (97.3)              | 0.3849  |  | 0                      | 4 (6.9)                | 1.00    |
| Complications                  |                        |                        |         |  |                        |                        |         |
| Stroke, n (%)                  | 1 (1.4)                | 1 (1.4)                | 1.00    |  | 0                      | 0                      | 1.00    |
| Spinal cord injury, n (%)      | 1 (1.4)                | 1 (1.4)                | 1.00    |  | 0                      | 0                      | 1.00    |
| Abdominal embolic event, n (%) | 1 (1.4)*               | 0                      | 0.4931  |  | 0                      | 0                      | 1.00    |
| Aortic rupture, n (%)          | 0                      | 0                      | 1.00    |  | 0                      | 1 (1.7) <sup>+</sup>   | 1.00    |
| Endoleaks                      |                        |                        |         |  |                        |                        |         |
| Type 1a, n (%)                 | 1 (1.4)                | 1 (1.4)                | 1.00    |  | 0                      | 1 (1.7) <sup>+</sup>   | 1.00    |
| Type 1b, n (%)                 | 1 (1.4)                | 0                      | 0.4931  |  | 0                      | 0                      | 1.00    |
| Type 1c, n (%)                 | 2 (2.8)                | 3 (4.1)                | 1.00    |  | 1 (9.1)                | 1 (1.7)                | 0.2954  |
|                                |                        |                        |         |  |                        |                        |         |
| <b>Late outcomes</b>           |                        |                        |         |  |                        |                        |         |
| Late death, n (%)              | 17 (23.9)              | 15 (20.1)              | 0.6907  |  | 1 (9.1)                | 4 (6.9)                | 1.00    |
| Complications                  |                        |                        |         |  |                        |                        |         |
| RTAD, n (%)                    | 1 (1.4)                | 0                      | 0.4931  |  | 0                      | 0                      | 1.00    |
| Distal SINE, n (%)             | 0                      | 0                      | 1.00    |  | 0                      | 3 (5.2)                | 1.00    |
| Stent graft infection, n (%)   | 1 (1.4)                | 0                      | 0.4931  |  | 0                      | 0                      | 1.00    |
| Bypass graft occlusion, n (%)  | 0                      | 1 (1.4)                | 1.00    |  | 0                      | 0                      | 1.00    |
| Endoleaks                      |                        |                        |         |  |                        |                        |         |
| Type 1a, n (%)                 | 1 (1.4)                | 1 (1.4)                | 1.00    |  | 0                      | 2 (3.5)                | 1.00    |
| Type 1b, n (%)                 | 2 (2.8)                | 0                      | 0.2414  |  | 0                      | 0                      | 1.00    |

Data are represented as mean  $\pm$  standard deviation and median (IQR: interquartile range)  
TAA: thoracic aortic aneurysm; DAA: dissecting aortic aneurysm; RTAD: retrograde type A  
dissection; SINE: stent graft-induced new entry; \*: same patient; †: same patient
